# Supplementary material
Source: PubMed Central journal article supplement (PMC8329271)
Supplement: plantbiotechnology-38-2-21.0222a-s001.pdf [file plantbiotechnology-38-2-21.0222a-s001.pdf]

**Supplementary Table S1. Primers used for *G. uralensis* gene cloning**

| Primer No. | Sequence (5' to 3')                        | Purpose                       |
|------------|--------------------------------------------|-------------------------------|
| 1          | <u>CACCATGGTGAAGATTTGCTGCATTGGA</u>        | Isolation: GuUGD1 – F         |
| 2          | AGCCACTGCAGGCATGCTTGAGCCAA                 | Isolation: GuUGD1 – R         |
| 3          | <u>CACCATGGTGAAGATTTGCTGCATTGGT</u>        | Isolation: GuUGD2 – F         |
| 4          | TGCCACAGCTGGCATGTCTTGAGCCAT                | Isolation: GuUGD2 – R         |
| 5          | <u>CACCATGGTGAAGATTTGCTGCATTGGTG</u>       | Isolation: GuUGD3 – F         |
| 6          | GGCCACAGCTGGCATGTCTTGAG                    | Isolation: GuUGD3 – R         |
| 7          | <u>CACCATGATGAAGATTTGTTGCATTGGAGC</u>      | Isolation: GuUGD4 – F         |
| 8          | GGCCACTACTGCAGGCATGCTTGA                   | Isolation: GuUGD4 – R         |
| 9          | <u>CACCATGGTACTAAAGATCTGTGGAATTG</u>       | Isolation: GuUGD5 – F         |
| 10         | TGCCTGCTGAGGCATGTTCTTCAGC                  | Isolation: GuUGD5 – R         |
| 11         | AAGGTAGGCATATGGAGCTCATGGTGAAGATTTGCTGCAT   | Infusion: GuUGD1 & GuUGD3 – F |
| 12         | TAGACTGCAGGTCGACAGCCACTGCAGGCATGTC         | Infusion: GuUGD1 – R          |
| 13         | GCACCGAGCTCATGGTGAAGATTTGCTGCAT            | Infusion: GuUGD2 – F          |
| 14         | ACAAAGTCGACTGCCACAGCTGGCATGTCTT            | Infusion: GuUGD2 – R          |
| 15         | TAGACTGCAGGTCGACGGCCACAGCTGGCATGTC         | Infusion: GuUGD3 – R          |
| 16         | AAGGTAGGCATATGGAGCTCATGATGAAGATTTGTTGCATTG | Infusion: GuUGD4 – F          |
| 17         | TAGACTGCAGGTCGACGGCCACTACTGCAGGCAT         | Infusion: GuUGD4 – R          |
| 18         | AAGGTAGGCATATGGAGCTCATGGTACTAAAGATCTGTGG   | Infusion: GuUGD5 – F          |
| 19         | TAGACTGCAGGTCGACTGCCTGCTGAGGCATGTT         | Infusion: GuUGD5 – R          |
| 20         | AAGGTAGGCATATGGAGCTCATGGTGAAGATATGTTGTATTG | Infusion: AtUGD2 – F          |
| 21         | TAGACTGCAGGTCGACGGCAACGGCAGGCATGTC         | Infusion: AtUGD2 – R          |

The underlined sequences were added to facilitate unidirectional cloning of the product into pENTR/D-TOPO (Thermo Fisher Scientific).

**Supplementary Table S2. GuUGDs isoforms isolated in this study**

Unigene No. 9220, 9877, 6695, 13362, 14817, 7645, 16486, and 16498 were obtained from the transcriptome database. The *G. uralensis* gene ID and scaffold are described in the genome database. Unigenes 6695, 13362, 14817, 7645, 16486, and 16498 were identified as partial CDSs.

| Isoform | Protein size (aa) | Unigene No.                  | <i>G. uralensis</i> gene ID | Scaffold      |
|---------|-------------------|------------------------------|-----------------------------|---------------|
| GuUGD1  | 481               | Unigene9220                  | Glyur005913s00045896        | Scaffold05913 |
| GuUGD2  | 480               | Unigene9877                  | Glyur000709s00024175        | Scaffold00709 |
| GuUGD3  | 480               | Unigene6695<br>Unigene13362  | Glyur004265s00037612        | Scaffold04265 |
| GuUGD4  | 481               | Unigene14817<br>Unigene7645  | Glyur000381s00016138        | Scaffold00381 |
| GuUGD5  | 482               | Unigene16486<br>Unigene16498 | Glyur000050s00005721        | Scaffold00050 |

**Supplementary Table S3. Primers used for *M. truncatula* gene cloning**

| Primer No. | Sequence (5' to 3')                        | Purpose               |
|------------|--------------------------------------------|-----------------------|
| 22         | <u>CACCATGGT</u> GAAAATTTGTTGCATTGG        | Isolation: MtUGD1 – F |
| 23         | TGCCACTGCAGGCATGTC                         | Isolation: MtUGD1 – R |
| 24         | <u>CACCATGGT</u> GAAGATTTGTTGCATTGG        | Isolation: MtUGD2 – F |
| 25         | AGCCACTGCAGGCATGTCCTTGAGCCAA               | Isolation: MtUGD2 – R |
| 26         | <u>CACCATGGT</u> TAAGAAGATCTGTGGAATTGG     | Isolation: MtUGD3 – F |
| 27         | GCAATCCACCCACTGGTCTATTGG                   | Isolation: MtUGD3 – R |
| 28         | AAGGTAGGCATATGGAGCTCATGGTAAAATTTGTTGCATTG  | Infusion: MtUGD1 – F  |
| 29         | TAGACTGCAGGTCGACTGCCACTGCAGGCATGTC         | Infusion: MtUGD1 – R  |
| 30         | AAGGTAGGCATATGGAGCTCATGGTGAAGATTTGTTGCATTG | Infusion: MtUGD2 – F  |
| 31         | TAGACTGCAGGTCGACAGCCACTGCAGGCATGTC         | Infusion: MtUGD2 – R  |
| 32         | AAGGTAGGCATATGGAGCTCATGGTTAAGAAGATCTGTGGAA | Infusion: MtUGD3 – F  |
| 33         | TAGACTGCAGGTCGACGCAATCCACCCACTGGTC         | Infusion: MtUGD3 – R  |

The underlined sequences were added to facilitate unidirectional cloning of the product into pENTR/D-TOPO (Thermo Fisher Scientific).

**Supplementary Table S4. Primers used for qRT-PCR**

| Primer No. | Sequence (5' to 3')     | Purpose                  |
|------------|-------------------------|--------------------------|
| 34         | GATTGAGGTAGCCGTGGTCCG   | qRT-PCR: GuUGD1 – L      |
| 35         | CTTCCCCTGCACTCCTTAC     | qRT-PCR: GuUGD1 – R      |
| 36         | ACTGTCCCTGTCAAACCGC     | qRT-PCR: GuUGD2 – L      |
| 37         | TTGATTGCAGTTCCTCAGCA    | qRT-PCR: GuUGD2 – R      |
| 38         | CTGGGGATAACAAGGGAGACA   | qRT-PCR: GuUGD3 – L      |
| 39         | AAGCATCCCAACCACACTC     | qRT-PCR: GuUGD3 – R      |
| 40         | AGGGGCTGTTGGGAGATAGG    | qRT-PCR: GuUGD4 – L      |
| 41         | GGGGCTTGGTGGTTGAAGAT    | qRT-PCR: GuUGD4 – R      |
| 42         | TCACTCCCGCATATCAGCTTG   | qRT-PCR: GuUGD5 – L      |
| 43         | CCTCACACACATGCTTCTCCA   | qRT-PCR: GuUGD5 – R      |
| 44         | TCTTCGAAACTGGCAGTGA     | qRT-PCR: GuTubulin – L   |
| 45         | CGAGATGTGAGTGGGGCAAA    | qRT-PCR: GuTubulin – R   |
| 46         | GGTGGTTTATCAGCGTGGGA    | qRT-PCR: GubAS – L       |
| 47         | TGCTCAACTACAATGTCCGCA   | qRT-PCR: GubAS – R       |
| 48         | ATGGACGAAAATTGGAGGACGA  | qRT-PCR: GuCYP88D6 – L   |
| 49         | CTGGTTGCTGTACTTTCATGGC  | qRT-PCR: GuCYP88D6 – R   |
| 50         | ATGGCGACCCTTACAAGCTC    | qRT-PCR: GuCYP72A154 – L |
| 51         | AGATTCGTGGTGACATCA      | qRT-PCR: GuCYP72A154 – R |
| 52         | CCAAGCACTCTACAACTCTCCA  | qRT-PCR: GuCYP93E3 – L   |
| 53         | GGATTTGCTTAGCCATTTCTGCA | qRT-PCR: GuCYP93E3 – R   |
| 54         | CAGGGGAGCCTAGTAACAATGAC | qRT-PCR: GuCYP72A566 – L |
| 55         | GCCCTGCCAAGTAAAATAGCTTC | qRT-PCR: GuCYP72A566 – R |
| 56         | GTGGTGCTTACTTGGCTGGA    | qRT-PCR: GuUGT73P12 – L  |
| 57         | GCCAACGACCCAAATGAAATCA  | qRT-PCR: GuUGT73P12 – R  |

**Supplementary Table S5. Correspondence between the accession number in GenBank and the gene model name in SoyBase or probe set ID in MtGEA**

*G. max* and *M. truncatula* UGD nucleotide sequences that correspond to nucleotide sequences in GenBank were retrieved from SoyBase\_Wm82.a1.v1.1 (<https://www.soybase.org/>) and MtGEA\_ver.3 (<https://mtgea.noble.org/v3/>), respectively, by blastn similarity search. No homologous nucleotide sequence to XP\_003607793 was found in the database. Protein size were calculated based on isolated MtUGD isoforms.

| <i>Glycine max</i>       |                                                |
|--------------------------|------------------------------------------------|
| GenBank accession number | SoyBase gene model name (SoyBase_Wm82.a1.v1.1) |
| NP_001304614             | Glyma01g06970                                  |
| XP_003518763             | Glyma02g12870                                  |
| NP_001238410             | Glyma08g26520                                  |
| XP_003552559             | Glyma18g50000                                  |
| XP_003543940             | Glyma13g06050                                  |
| XP_003554799             | Glyma19g03500                                  |
| XP_003525453             | Glyma05g00590                                  |
| XP_003549560             | Glyma17g08490                                  |

| <i>Medicago truncatula</i> |                   |                          |                                   |
|----------------------------|-------------------|--------------------------|-----------------------------------|
| Isoform                    | Protein size (aa) | GenBank accession number | MtGEA probe set ID (MtGEA ver. 3) |
| MtUGD1                     | 480               | XP_003607793             | -                                 |
| MtUGD2                     | 480               | XP_003621403             | Mtr.48440.1.S1_at                 |
| MtUGD3                     | 478               | XP_013457966             | Mtr.41235.1.S1_at                 |
| -                          | -                 | XP_003614035             | Mtr.25689.1.S1_at                 |

**Supplementary Table S6. Identities between the X-ray crystal homo-hexamer structure of human UGD and GuUGDs**

| Isoform | Template |                    |               | Sequence         |                |         |          | Quality |      |
|---------|----------|--------------------|---------------|------------------|----------------|---------|----------|---------|------|
|         | SMTL ID  | Biunit Oligo State | Method        | Seq identity [%] | Seq similarity | Range   | Coverage | QSQE    | GMQE |
| GuUGD2  | 6c4j.2   | Homo-hexamer       | X-ray, 2.53 Å | 61.46            | 0.48           | 1 – 469 | 0.97     | 0.63    | 0.78 |
| GuUGD5  | 6c4j.2   | Homo-hexamer       | X-ray, 2.53 Å | 59.44            | 0.47           | 2 – 471 | 0.97     | 0.62    | 0.78 |

**Supplementary Table S7. Amino acid sequence identity among MtUGD1–3 and GuUGDs**

|        | MtUGD2 | MtUGD3 | GuUGD1 | GuUGD2 | GuUGD3 | GuUGD4 | GuUGD5 |
|--------|--------|--------|--------|--------|--------|--------|--------|
| MtUGD1 | 85 %   | 74 %   | 90 %   | 86 %   | 87 %   | 99 %   | 81 %   |
| MtUGD2 |        | 74 %   | 87 %   | 95 %   | 92 %   | 85 %   | 82 %   |
| MtUGD3 |        |        | 74 %   | 75 %   | 75 %   | 74 %   | 82 %   |

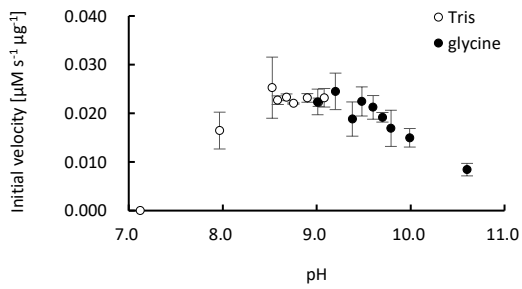

### Supplementary Figure S1. Enzyme activity under various pH conditions

0.5  $\mu\text{g}$  GuUGD4, 500  $\mu\text{M}$  UDP-glucose, and 1,000  $\mu\text{M}$   $\text{NAD}^+$  were used in this assay. Values represent the mean  $\pm$  SD of three measurements.



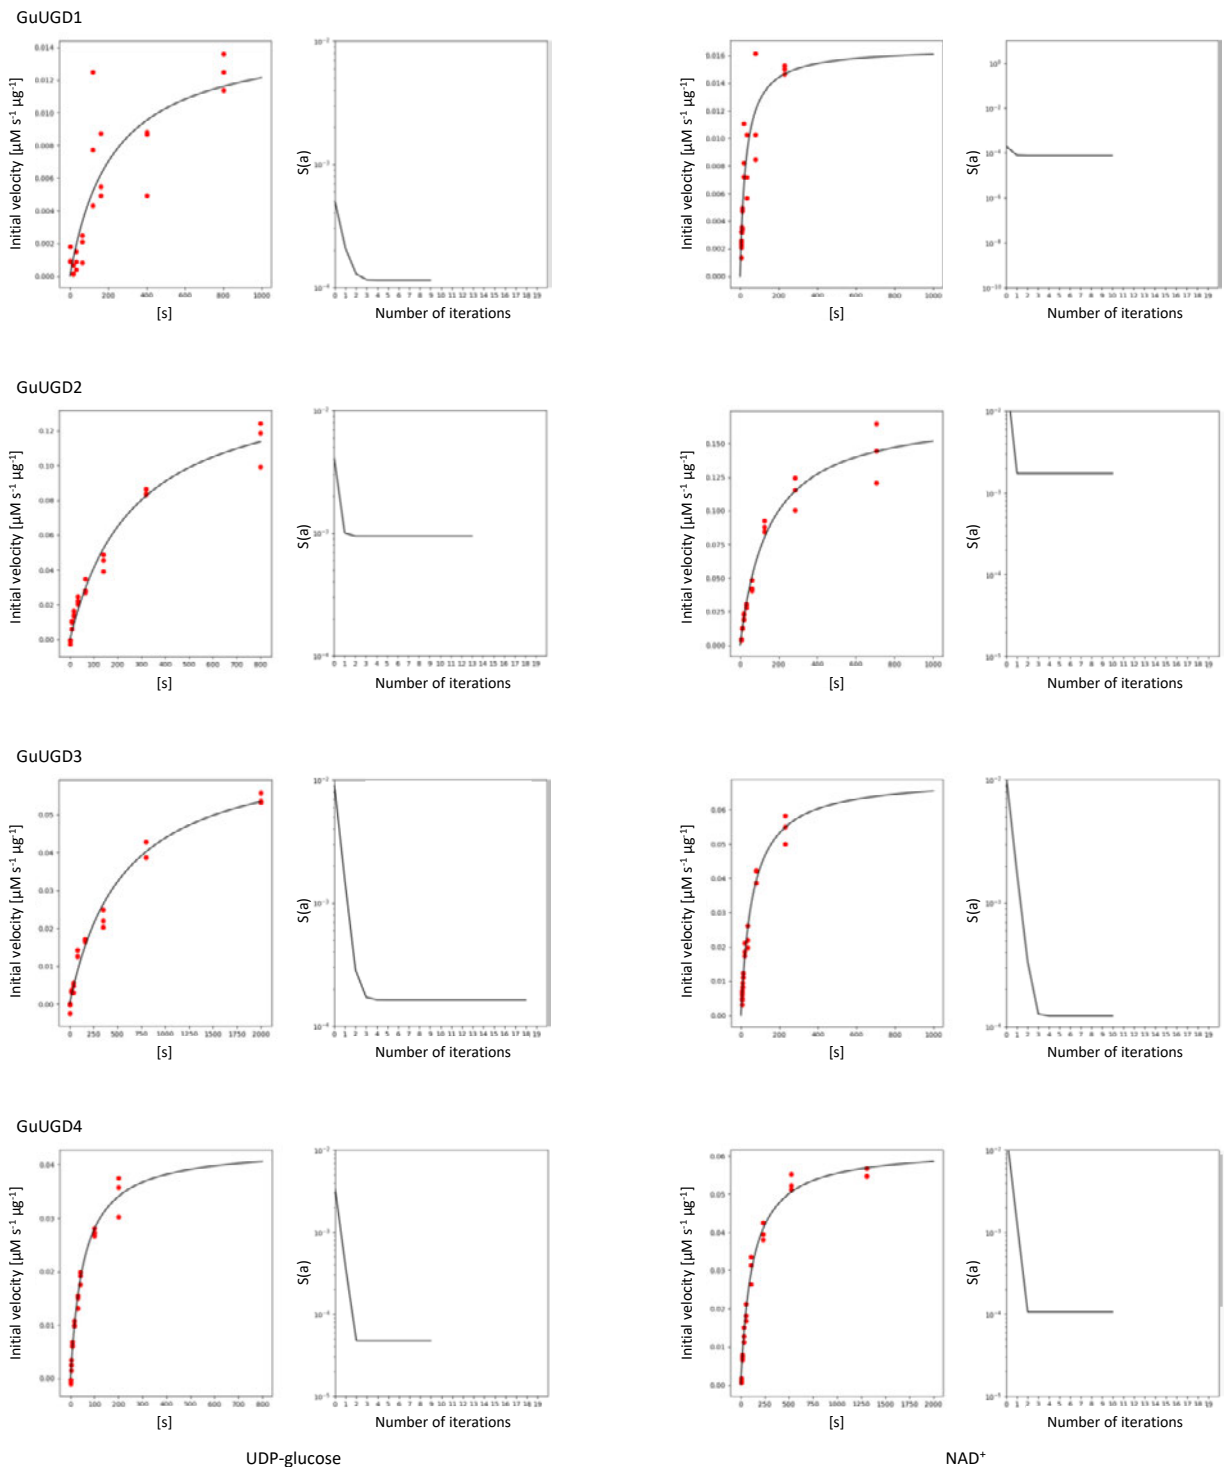

**Supplementary Figure S2. Kinetic analyses of GuUGDs**

The kinetic parameters of the recombinant GuUGDs were determined for both the substrate UDP-glucose and the cofactor NAD<sup>+</sup>. Left panels indicate the results of curve fitting based on the Michaelis-Menten equation by the Gauss-Newton method. Right panels indicate the relationship between the number of iterations and the sum of squares of fitting parameters. Convergence to any sum of squares value suggests a successful fit.

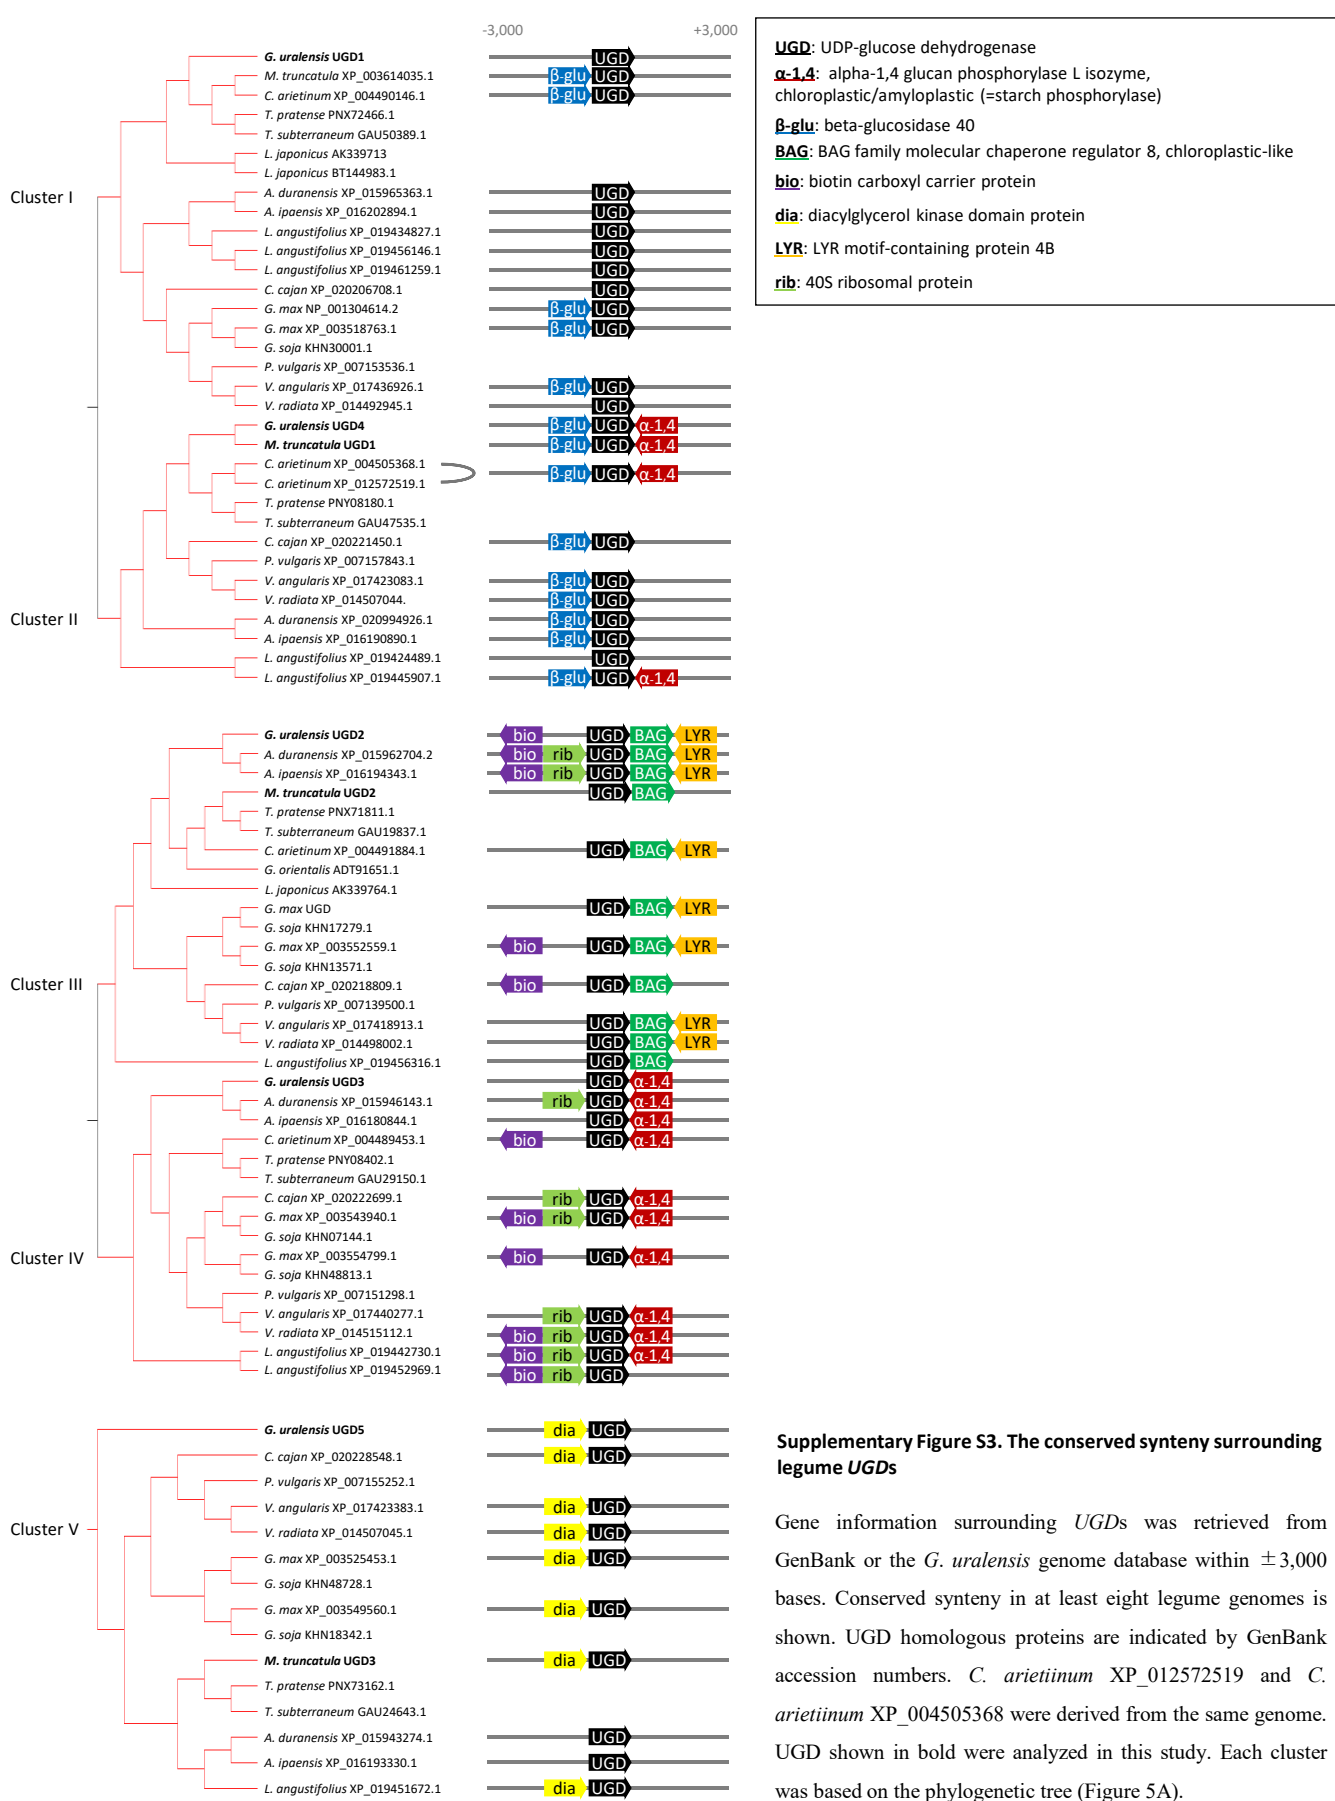

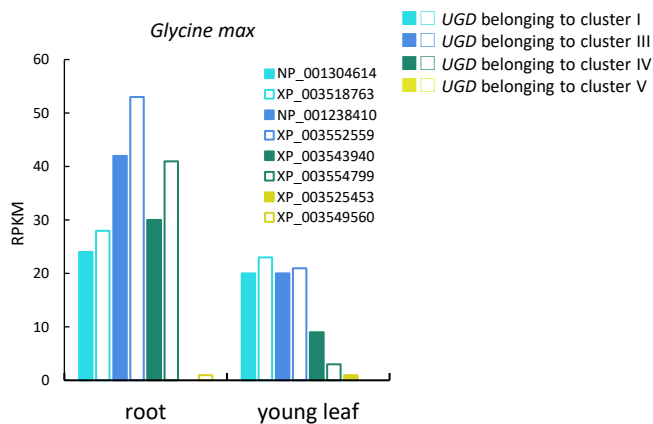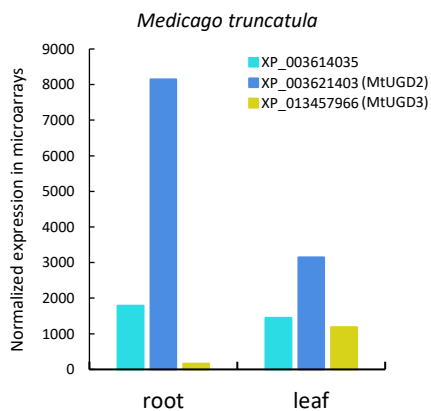

#### Supplementary Figure S4. Expression of legume UGDs

Expression of *UGDs* is based on RPKM values (*G. max*) or normalized expression in microarrays (*M. truncatula*). Transcript levels of *M. truncatula* *UGDs* are based on the fluorescence intensity of each hybridized DNA probe, which was performed using global normalization (Benedito et al. 2008). *UGD* genes belonging to clusters I, III, IV, and V are light blue, blue, green, and yellow, respectively. Number correspondence between GenBank, each database and isolated isoforms is displayed in Supplementary Table S5.

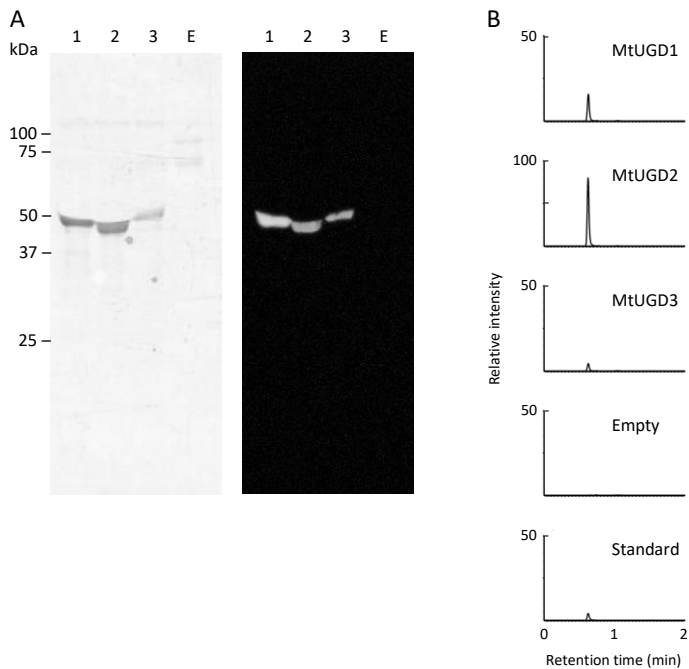

### Supplementary Figure S5. UGD activity of purified MtUGD recombinant proteins

(A) Electrophoresis of purified recombinant proteins. Purified His-tagged recombinant proteins were detected in a UV-stained SDS-PAGE gel (left panel) and by anti-His detection in a Western blotting membrane transferred from an identical gel (right panel). UGDs were detected as ~50 kDa. **Lanes 1–3:** purified recombinant MtUGD1–3 proteins (6  $\mu$ l of MtUGD1–3 solutions were loaded, respectively); **E:** protein solution removed non-interactive protein for the TALON resin, extracted from IPTG-induced *E. coli* transformed with empty vector (6  $\mu$ l of protein solution was loaded). (B) UPLC-MS chromatograms at  $m/z$  579.1 for the *in vitro* reaction products. All reaction products were diluted 10 times after 1 day of incubation using 1  $\mu$ g of each purified UGD (protein solution extracted from *E. coli* transformed with empty vector was used at the same volume used for UGD-containing protein solutions). 100 % corresponds to the intensity indicated in products catalyzed by MtUGD2. UDP-glucuronic acid was used as an authentic standard.

Cluster V

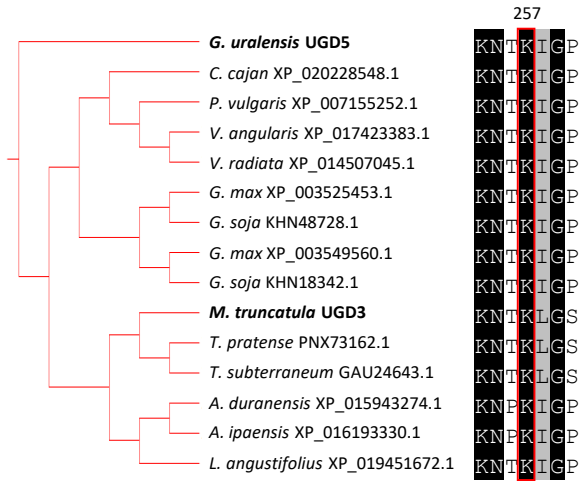

**Supplementary Figure S6. A unique amino acid residue of Fabales UGDs belonging to cluster V**

Parts of the aligned amino acid sequences of Fabales UGDs belonging to cluster V (based on the phylogenetic tree; Figure 5A) are shown. The alignment was performed using BioEdit with ClustalW. Amino acid residues framed in red likely decreased attraction to UDP-glucose.

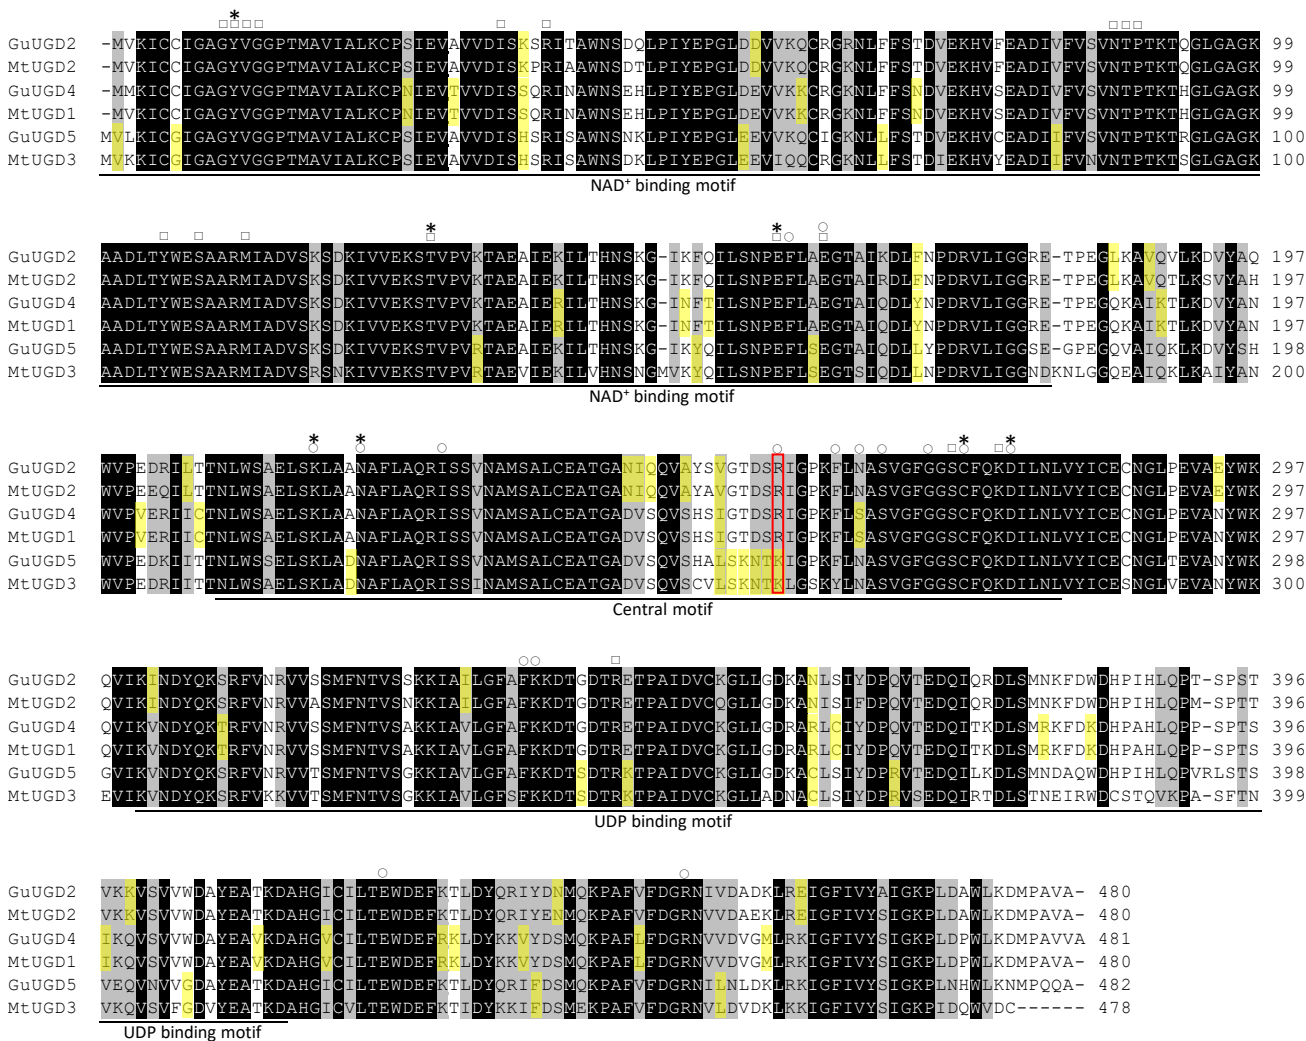

\* proposed as important residues for catalysis in previous reports  
 o shown as having UDP-glucose interaction in SWISS-MODEL  
 □ shown as having NAD<sup>+</sup> interaction in SWISS-MODEL

**Supplementary Figure S7. Amino acid sequences of GuUGD2, GuUGD4, GuUGD5 and MtUGD1–3**

Alignment of amino acid sequences deduced from cDNA of cloned GuUGD2, GuUGD4, GuUGD5 and MtUGD1–3. MtUGD belonging to the same cluster as the GuUGD was displayed below the GuUGD sequence. We made the alignment using BioEdit with ClustalW. The NAD<sup>+</sup> binding motif, UDP binding motif, and central motif were annotated based on GenBank. Asterisks indicate key residues for catalysis proposed in previous studies (Campbell et al. 2000; Egger et al. 2011); circles and squares indicate amino acids shown as key residues interacting with UDP-glucose and NAD<sup>+</sup>, respectively, by SWISS-MODEL. Amino acid residues shown in yellow background were specific to the cluster. The amino acid residue framed in red was the same position as shown in Figure 2.

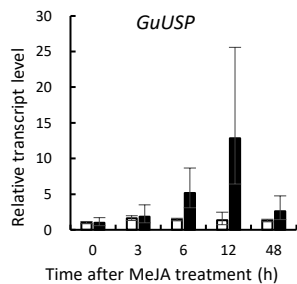

**Supplementary Figure S8. Quantitative expression analyses (qPCRs) of *USP* transcripts**

Transcript levels in mock-treatment tissue-cultured stolons are indicated by outlined bars; MeJA treatments are indicated by filled bars. Relative transcript levels 0 h after treatment were set equal to 1. Error bars indicate the SD of three technical replicates.
